# Supplementary material
Source: Research Square preprint supplement (doi:10.21203/rs.3.rs-9194788/v1)
Supplement: Supplementary file 1 [file 9e0f16a429a61b2e410a9e51.docx]

**Supporting Information**

**Carbon-Dot-Modified TiO₂: Enhanced H₂O₂ Generation Through Synergistic Free Radical and Singlet Oxygen Mechanisms**

*Song Zhang1, #, Jiaojiao Li1, Bing Liu1, *, Haiguang Zhao1, Yuanyuan Zhang1, Xiaoli yang1, Yuanming Zhang1, Zhan Jiang1*

1 College of Materials Science and Engineering, College of Textiles and Clothes, College of Physics, State Key Laboratory of Bio-Fibers and Eco-Textiles, Qingdao University, No. 308 Ningxia Road, Qingdao 266071, P. R. China.

*Corresponding authors. E-mail: [liubingo@qdu.edu.cn](mailto:liubingo@qdu.edu.cn)

Supporting Figures


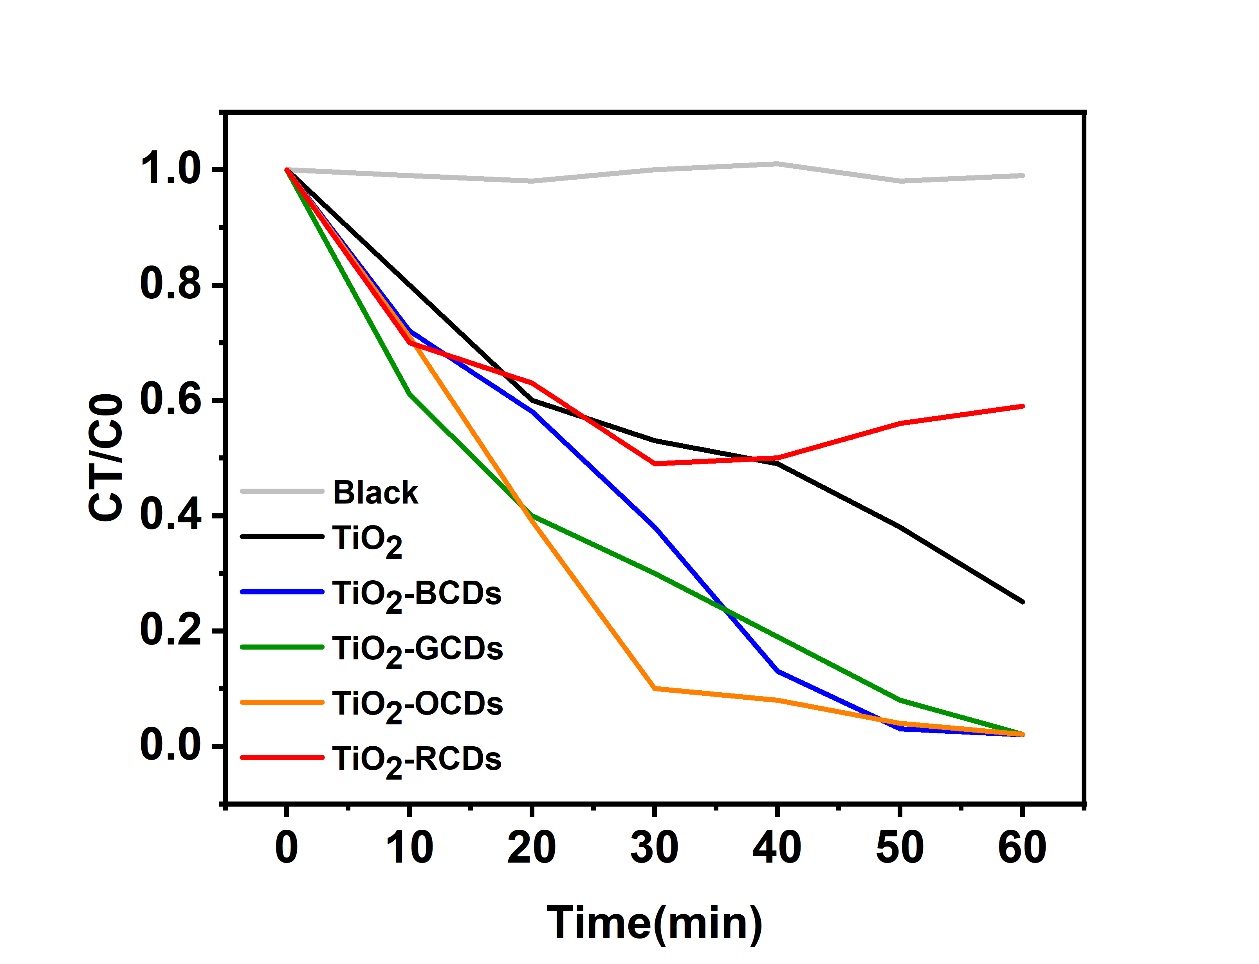


**Figure S1**. Methyl Orange Degradation Using TiO₂ and CD-Modified TiO₂

**(a)**


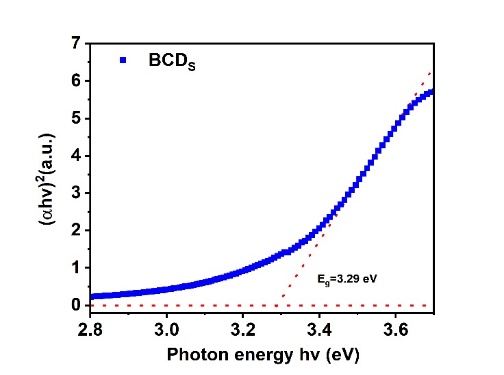

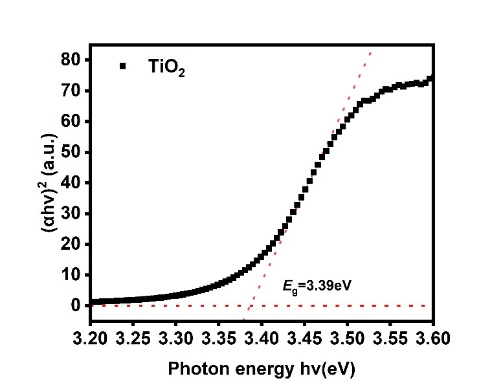


**(b)**

**(c)**


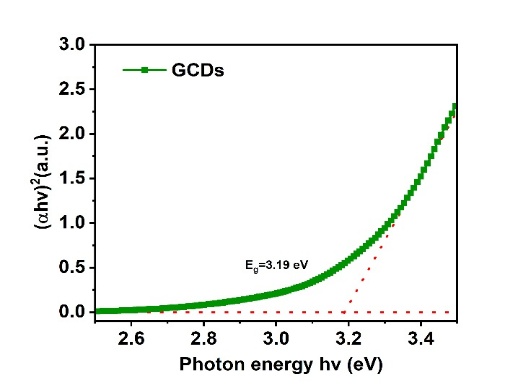


**(d)**


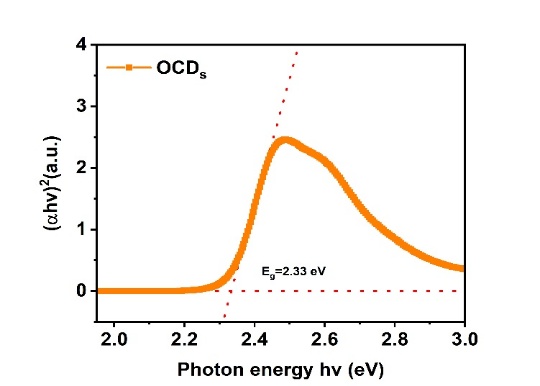


**(e)**


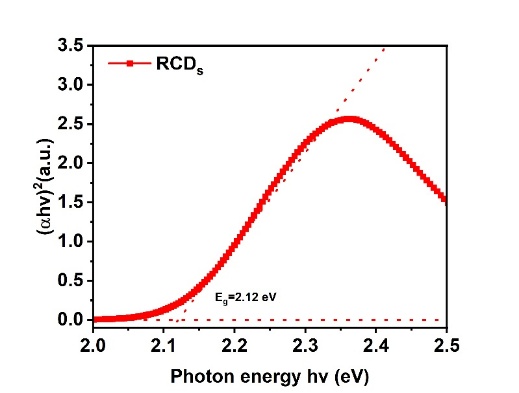


**Figure S2**. (a-e) Band gap calculation of TiO₂ and CDs-TiO₂ via Tauc equation

**(a)**

**(b)**


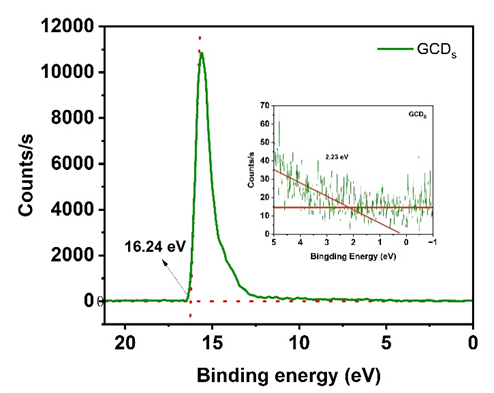

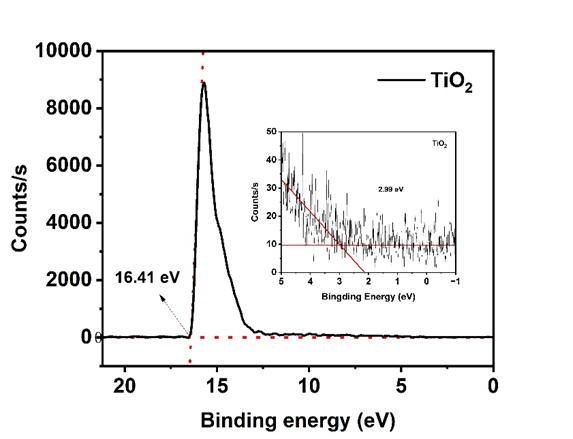

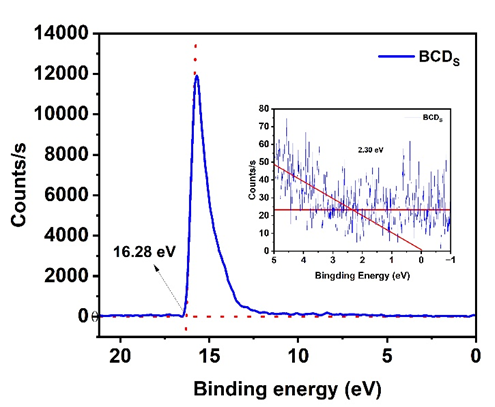

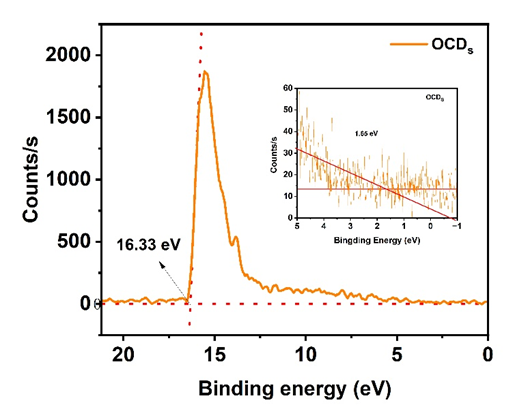


**(d)**

**(c)**

**(e)**


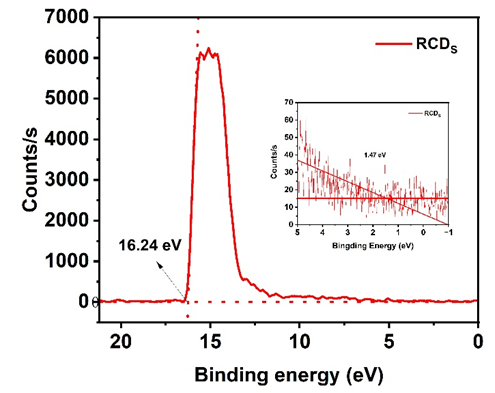


**Figure S3**. (a-e) UPS spectra of TiO₂ and four different CDs-TiO₂ composites

Supporting **Experimental Section**

**Photocatalytic H₂O₂ Production Experiment**

The prepared photocatalyst was added to 100 mL of 10% ethanol/water (v/v) solution, and the mixture was bubbled with O₂ for 30 min to achieve O₂ adsorption/desorption equilibrium in the dark. Subsequently, the reaction solution was exposed to a 300 W xenon arc lamp for 1 hour of irradiation. Every 10 minutes after irradiation, barium carbonate was added to agglomerate TiO₂ and CDs-TiO₂. After that, 1 mL of the solution was collected using a syringe through a 0.45 μm Millipore filter.

The filtered reaction solution was mixed with 1 mL of 0.1 mol·L⁻¹ C₈H₅KO₄ solution and 1 mL of 0.4 mol·L⁻¹ KI solution. The mixture was allowed to react for 30 min, and then subjected to ultraviolet-visible (UV-Vis) spectroscopy analysis.
