# Supplementary material
Source: Research Square preprint supplement (doi:10.21203/rs.3.rs-9194788/v1)

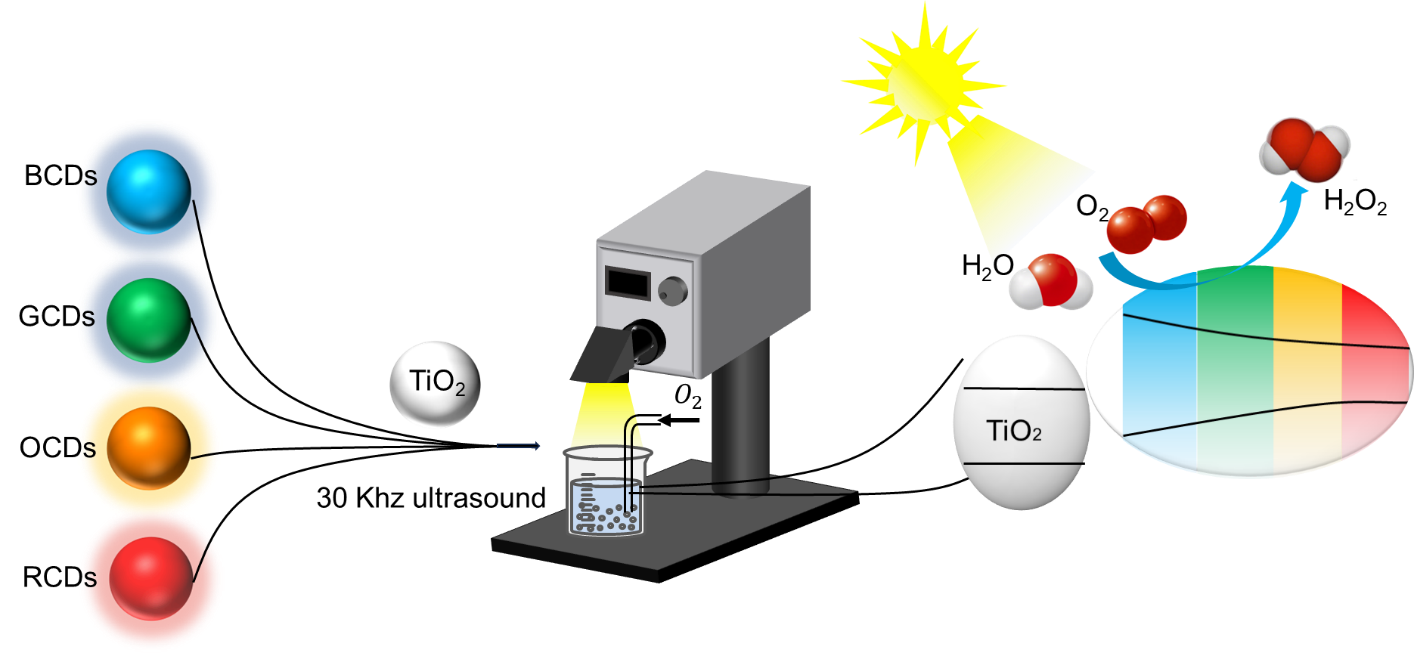


**Scheme 1.** Schematic illustration of the preparation process for CDs-TiO₂ photocatalysts.

Supplement: Supplementary file 2 [file f37fe19cb71cd6601d69959f.docx]
